# Supplementary material
Source: Springer Nature journal article supplement (https://www.springermedizin.de/resource/supplementary/12936_2012_2213_MOESM2_ESM.pdf/9542826)

Fold increase from spontaneous secretion

IL-10

TNF

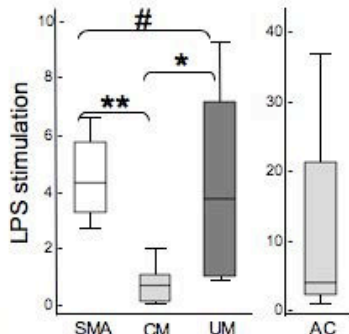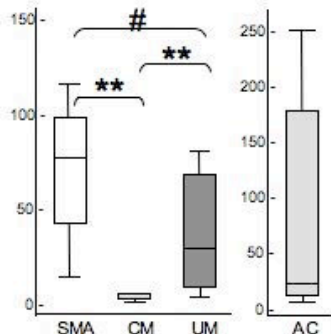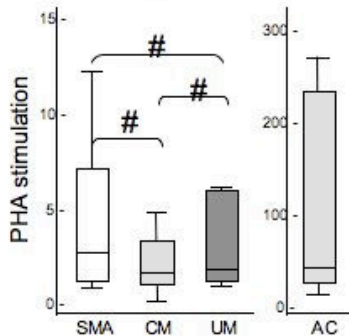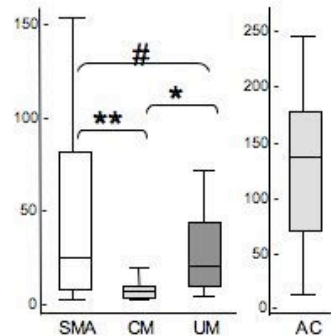

Supplement: MOESM2 [file 9542826]
